# Supplementary material for: Suitability of alkyne donor-π-donor-π-donor scaffolds for electrofluorochromic and electrochromic use
Source: Royal Society of Chemistry journal article supplement (doi:10.1039/d1tc03388c), 2022-01-01
Supplement: d1tc03388c3.pdf [file d1tc03388c3.pdf]

## Electronic Supporting Information

### **Suitability of alkyne donor- $\pi$ - donor- $\pi$ -donor scaffolds for electrofluorochromic and electrochromic use**

Monika Wałęsa-Chorab,<sup>1,2\*</sup> Kacper Muras,<sup>2</sup> Heather L. Filiatrault,<sup>1</sup> and W.G. Skene<sup>1\*</sup>

<sup>1</sup>Laboratoire de caractérisation photophysique des matériaux conjugués Département de Chimie,  
Campus MIL, Université de Montréal, CP 6128, succ. Centre-ville, Montréal, Québec, Canada H3C  
3J7

<sup>2</sup>Faculty of Chemistry, Adam Mickiewicz University in Poznań, Uniwersytetu Poznanskiego 8, 61-614  
Poznań, Poland

## Table of Contents

|                                                                                               |    |
|-----------------------------------------------------------------------------------------------|----|
| Figure S1. Normalized absorption spectra of <b>1</b> .....                                    | 3  |
| Figure S2. Normalized absorption spectra of <b>2</b> .....                                    | 3  |
| Figure S3. Normalized absorption spectra of <b>3</b> .....                                    | 3  |
| Figure S4. Normalized absorption spectra of <b>4</b> .....                                    | 4  |
| Figure S5. Top: normalized emission spectra of <b>2</b> .....                                 | 4  |
| Figure S6. Top: normalized emission spectra of <b>4</b> .....                                 | 5  |
| Figure S7. Stokes shift of <b>1</b> (■), <b>2</b> (●), <b>3</b> (▲), and <b>4</b> (▼).....    | 5  |
| Figure S8. The spectroelectrochemistry of <b>1</b> . ....                                     | 6  |
| Figure S9. The spectroelectrochemistry of <b>2</b> . ....                                     | 7  |
| Figure S10. The spectroelectrochemistry of <b>3</b> . ....                                    | 7  |
| Figure S11. The spectroelectrochemistry of <b>4</b> .....                                     | 8  |
| Figure S12. The spectroelectrochemistry of <b>5</b> .....                                     | 9  |
| Figure S13. The spectroelectrochemistry of <b>5</b> .....                                     | 10 |
| Figure S14. The change in optical density of <b>1</b> .....                                   | 10 |
| Figure S15. Change in transmittance percent of electrochromic device of <b>1</b> .....        | 11 |
| Figure S16. Change in percent transmittance of <b>2</b> . ....                                | 11 |
| Figure S17. Change in transmittance of spray coated <b>2</b> . ....                           | 12 |
| Figure S18. Baseline corrected change in percent transmittance of spin coated <b>2</b> . .... | 12 |
| Figure S19. Baseline corrected change in percent transmittance of spin coated <b>2</b> . .... | 13 |
| Figure S20. Baseline corrected change in percent transmittance of spin coated <b>3</b> . .... | 13 |
| Figure S21. Baseline corrected change in percent transmittance of spin coated <b>4</b> . .... | 14 |
| Figure S22. AFM images for surface roughness analyses of <b>2</b> .....                       | 14 |
| Figure S23. Photograph of electrochromic device of <b>2</b> .....                             | 16 |
| Figure S24. Fluorescence change of <b>1</b> .....                                             | 16 |
| Figure S25. Fluorescence change of <b>2</b> .....                                             | 17 |
| Figure S26. Fluorescence change of <b>3</b> .....                                             | 17 |
| Figure S27. Fluorescence change of <b>4</b> .....                                             | 18 |
| Figure S28. Cyclic voltammogram of <b>5</b> . ....                                            | 18 |
| Figure S29. SOMO (left) and spin distribution (right).....                                    | 19 |
| Figure S30. <sup>1</sup> H NMR of <b>A</b> in CDCl <sub>3</sub> .....                         | 20 |
| Figure S31. <sup>13</sup> C NMR spectra of <b>A</b> in CDCl <sub>3</sub> . ....               | 21 |
| Figure S32. <sup>1</sup> H NMR spectra of <b>B</b> in CDCl <sub>3</sub> .....                 | 22 |
| Figure S33. <sup>13</sup> C NMR spectra of <b>B</b> in CDCl <sub>3</sub> .....                | 23 |
| Figure S34. <sup>1</sup> H NMR spectra of <b>1</b> in CDCl <sub>3</sub> . ....                | 24 |
| Figure S35. <sup>13</sup> C NMR spectra of <b>1</b> in CDCl <sub>3</sub> . ....               | 25 |
| Figure S36. <sup>1</sup> H NMR spectra of <b>2</b> in CDCl <sub>3</sub> . ....                | 26 |
| Figure S37. <sup>13</sup> C NMR spectra of <b>2</b> in acetone-d <sub>6</sub> . ....          | 27 |
| Figure S38. <sup>1</sup> H NMR spectra of <b>3</b> in CDCl <sub>3</sub> . ....                | 28 |
| Figure S39. <sup>13</sup> C NMR spectra of <b>3</b> in CDCl <sub>3</sub> . ....               | 29 |
| Figure S40. <sup>1</sup> H NMR spectra of <b>4</b> in CDCl <sub>3</sub> . ....                | 30 |
| Figure S41. <sup>13</sup> C NMR spectra of <b>4</b> in CDCl <sub>3</sub> . ....               | 31 |

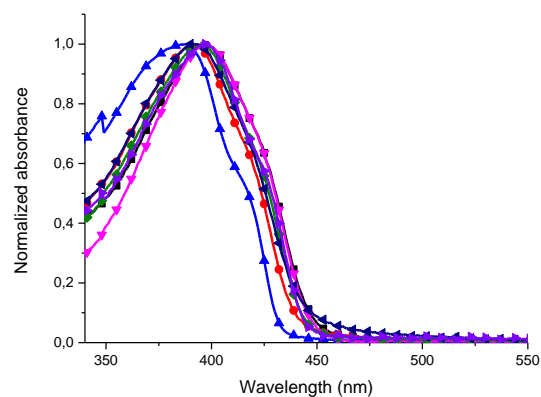

Figure S1. Normalized absorption spectra of **1** measured in hexane ( $\blacktriangle$ ), toluene ( $\blacktriangleright$ ), THF ( $\blacklozenge$ ), ethanol ( $\bullet$ ), dichloromethane ( $\blacksquare$ ), acetone ( $\blacktriangledown$ ) and acetonitrile ( $\blacktriangleleft$ ).

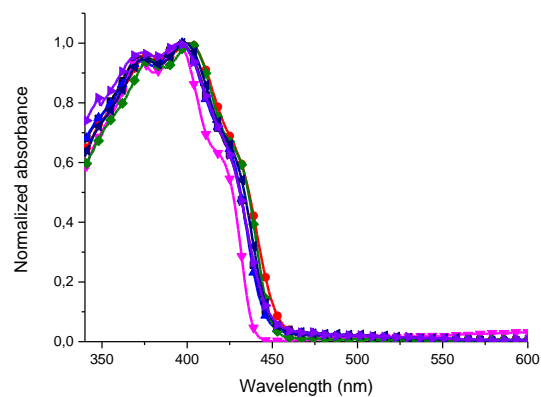

Figure S2. Normalized absorption spectra of **2** measured in hexane ( $\blacktriangledown$ ), toluene ( $\blacklozenge$ ), THF ( $\blacktriangleleft$ ), ethanol ( $\blacktriangle$ ), dichloromethane ( $\bullet$ ), acetone ( $\blacksquare$ ) and acetonitrile ( $\blacktriangleright$ ).

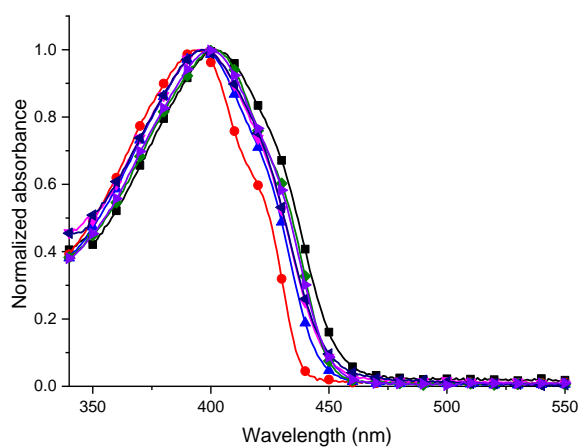

Figure S3. Normalized absorption spectra of **3** measured in hexane ( $\bullet$ ), toluene ( $\blacklozenge$ ), THF ( $\blacktriangleright$ ), ethanol ( $\blacktriangle$ ), dichloromethane ( $\blacksquare$ ), acetone ( $\blacktriangledown$ ) and acetonitrile ( $\blacktriangleleft$ ).

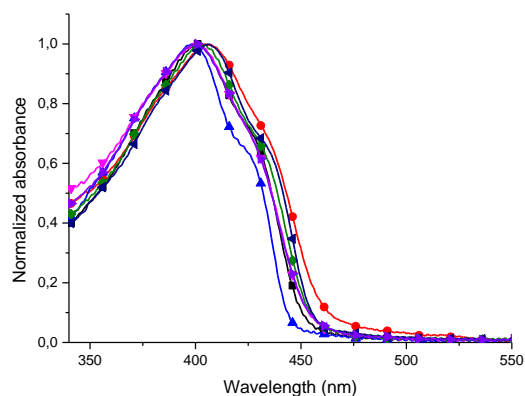

Figure S4. Normalized absorption spectra of **4** measured in hexane (▲), toluene (◄), THF (◆), ethanol (■), dichloromethane (●), acetone (▼) and acetonitrile (►).

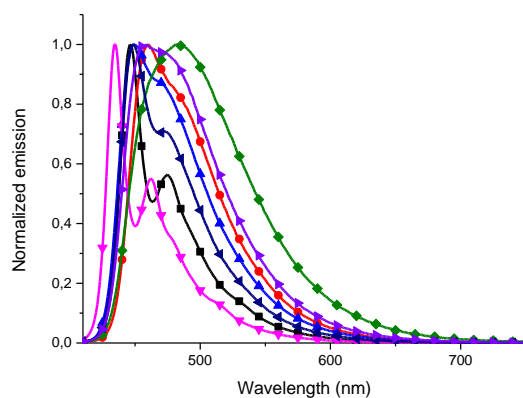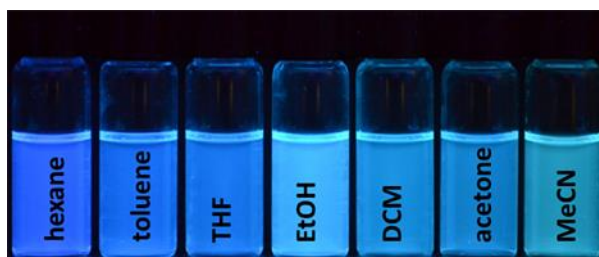

Figure S5. Top: normalized emission spectra of **2** measured in hexane (▼), toluene (■), THF (◄), ethanol (▲), dichloromethane (●), acetone (►) and acetonitrile (◆). Bottom: photograph showing the fluorescence of **2** in different solvents.

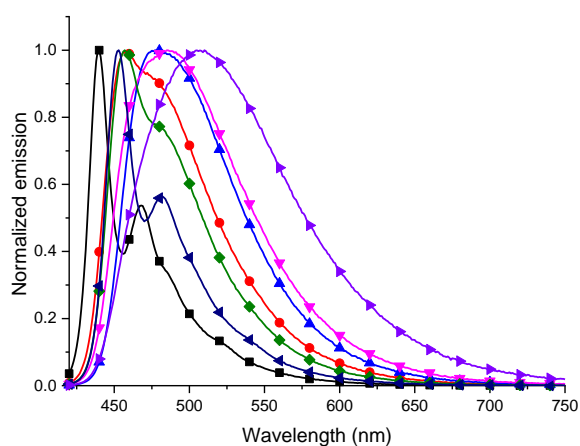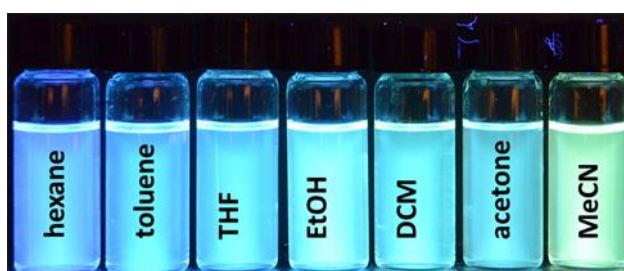

Figure S6. Top: normalized emission spectra of **4** measured in hexane (■), toluene (◄), THF (◆), ethanol (●), dichloromethane (▲), acetone (▼) and acetonitrile (►). Bottom: photograph showing the fluorescence of **4** in different solvents.

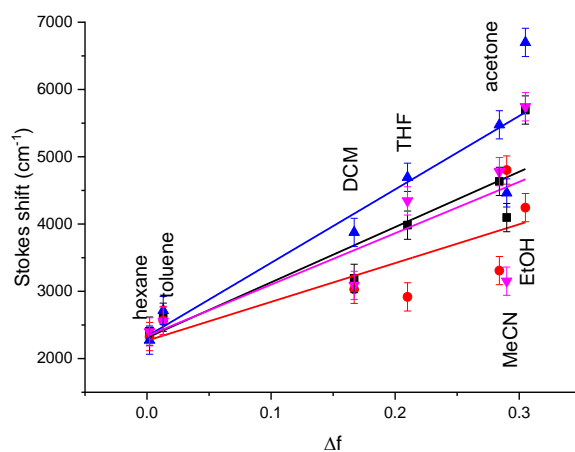

Figure S7. Stokes shift of **1** (■), **2** (●), **3** (▲), and **4** (▼) as a function of solvent orientation polarizability ( $\Delta f$ ) for various solvents.

Table S1. Linear regression fitting parameters for Stokes shift as a function of solvent orientation polarizability ( $\Delta f$ ) for various solvents.

| Compound | Intercept |                | Slope |                | Statistics    |
|----------|-----------|----------------|-------|----------------|---------------|
|          | Value     | Standard Error | Value | Standard Error | Adj. R-Square |
| <b>1</b> | 2311      | 367            | 8219  | 1690           | 0.791         |
| <b>2</b> | 2267      | 385            | 5764  | 1772           | 0.615         |
| <b>3</b> | 2332      | 467            | 10914 | 2153           | 0.805         |
| <b>4</b> | 2337      | 589            | 7635  | 2713           | 0.536         |

Table S2. Linear regression fitting parameters for Stokes shift as a function of  $E_T(30)$ .

| Compound | Intercept |                | Slope |                | Statistics    |
|----------|-----------|----------------|-------|----------------|---------------|
|          | Value     | Standard Error | Value | Standard Error | Adj. R-Square |
| <b>1</b> | -4975     | 1030           | 227   | 27             | 0.935         |
| <b>2</b> | -3114     | 1364           | 167   | 35             | 0.812         |
| <b>3</b> | -7493     | 787            | 306   | 20             | 0.979         |
| <b>4</b> | -5474     | 1059           | 242   | 27             | 0.939         |

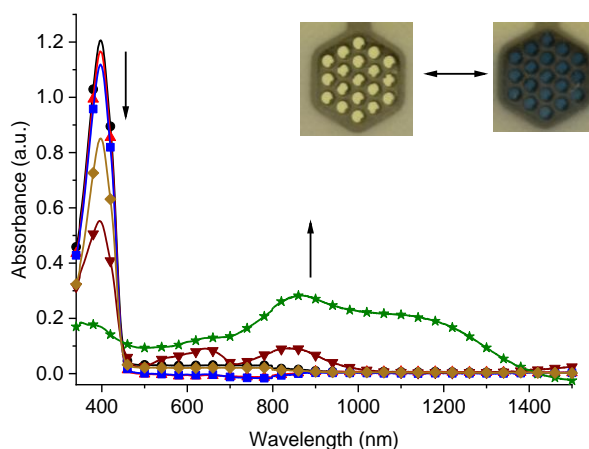

Figure S8. The spectroelectrochemistry of **1** in anhydrous and deaerated dichloromethane with TBAPF<sub>6</sub> (0.1 M) as an electrolyte with applied potential 0 (●), 700 (▲), 800 (■), 900 (▼) and 1000 (★) mV followed by -500 (◆) mV held for 30 sec per potential. Inset: photographs of honeycomb electrode of the original (left) and the electrochemically oxidized (right) **1** by applying a potential of 1000 mV for 1 min.

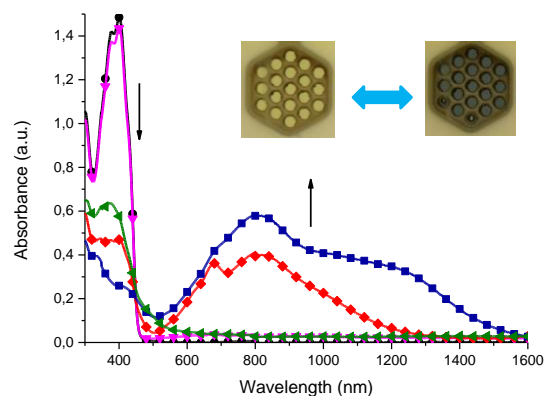

Figure S9. The spectroelectrochemistry of **2** in anhydrous and deaerated dichloromethane with TBAPF<sub>6</sub> (0.1 M) as an electrolyte with applied potentials of 0 (●), 800 (▼), 900 (◆), and 1000 (■) mV followed by -500 (◄) mV held for 30 sec per potential. Insert: photographs of original (left) and electrochemically oxidized (right) **2** by applying a potential of 1000 mV for 1 min.

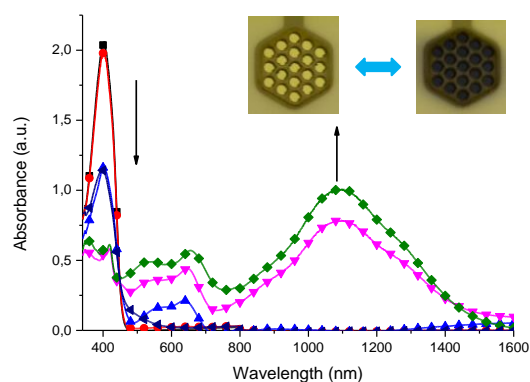

Figure S10. The spectroelectrochemistry of **3** in anhydrous and deaerated dichloromethane with TBAPF<sub>6</sub> (0.1 M) as an electrolyte with applied potentials of 0 (■), 700 (●), 800 (▲), 900 (▼), and 1000 (◆) mV followed by -500 (◄) mV held for 30 sec per potential. Insert: photographs of original (left) and electrochemically oxidized (right) **3** by applying a potential of 1000 mV for 1 min.

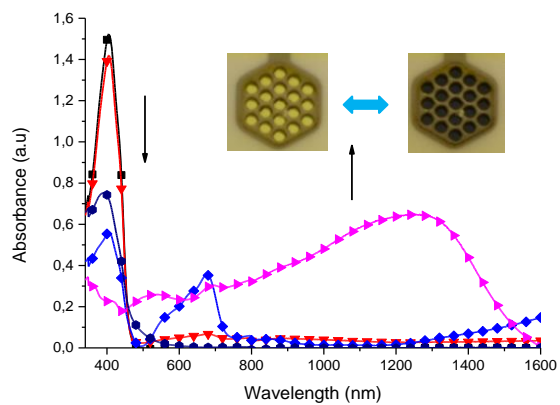

Figure S11. The spectroelectrochemistry of **4** in anhydrous and deaerated dichloromethane with TBAPF<sub>6</sub> (0.1 M) as an electrolyte with applied potentials of 0 (■), 800 (▼), 900 (◆), and 1000 (▶) mV followed by -500 (●) mV held for 30 sec per potential. Insert: photographs of original (left) and electrochemically oxidized (right) **4** by applying a potential of 1000 mV for 1 min.



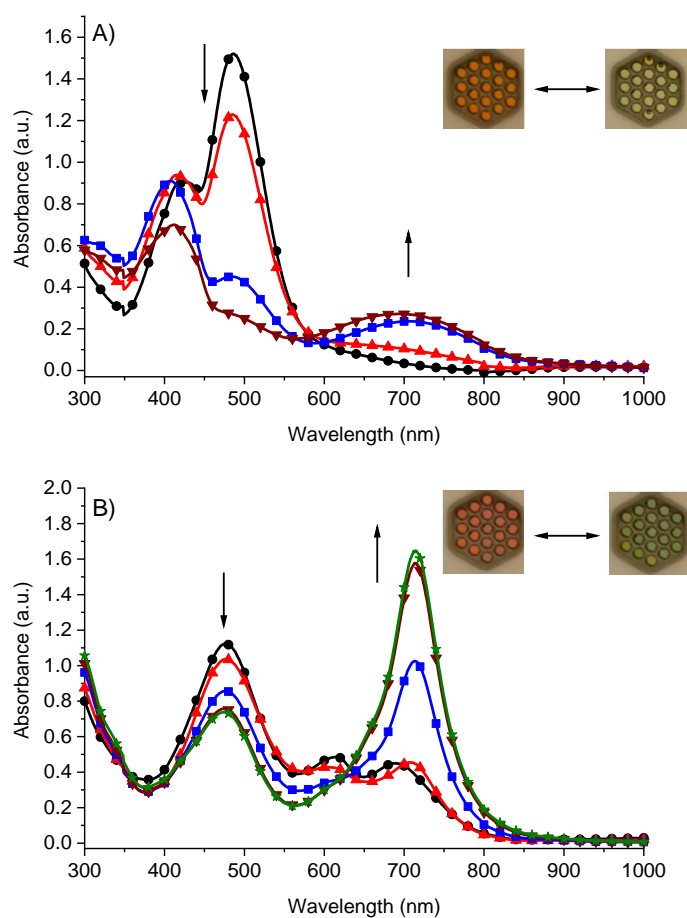

Figure S12. The spectroelectrochemistry of **5** in anhydrous and deaerated dichloromethane with TBAPF<sub>6</sub> (0.1 M) as an electrolyte with applied potential: A) 0 (●), 1200 (▲), 1300 (■), and 1400 (▼) mV; B) -300 (●), -400 (▲), -500 (■) -600 (▼), and -700 (★) mV held for 30 sec per potential. Inset: photographs of the honeycomb electrode of **5** A) original (left) and electrochemically oxidized (right) by applying a potential of 1400 mV for 1 min.; B) potential of -300 mV (left) and -700 mV applied for 1 min.

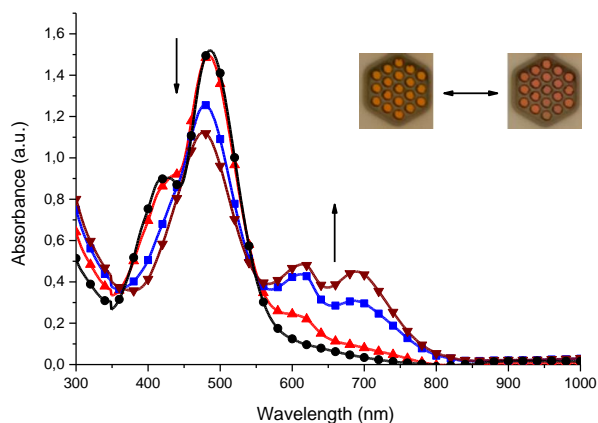

Figure S13. The spectroelectrochemistry of **5** in anhydrous and deaerated dichloromethane with 0.1 M TBAPF<sub>6</sub> as an electrolyte with applied potential 0 (●), -100 (▲), -200 (■) and -300 (▼) mV. Insert: photographs of original (left) and electrochemically reduced (right) **5** by applying a potential of -300 mV for 1 min.

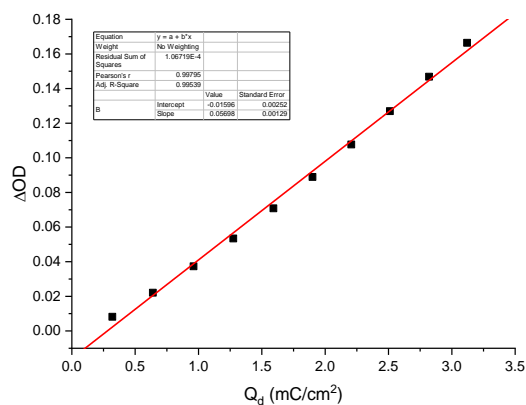

Figure S14. The change in optical density of **1** monitored at 730 nm as a function of charge density at +2.6 V.

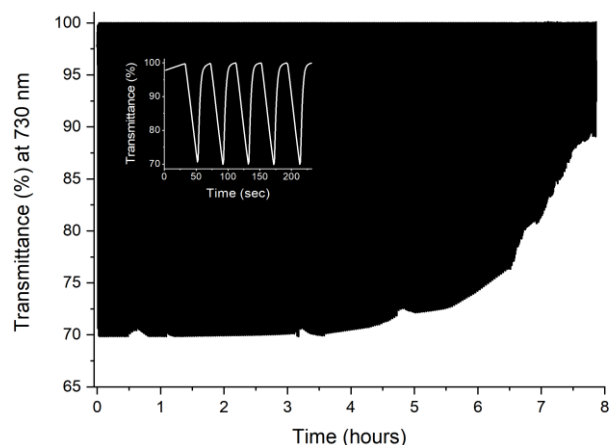

Figure S15. Baseline corrected change in percent transmittance of the electrochromic device prepared from **1** monitored at 730 nm with applied potential of 2.5 and -1.5 V switched at 20 s intervals during 8 hours of continuous operation. Inset: zoom of the first five switching cycles of applied potential.

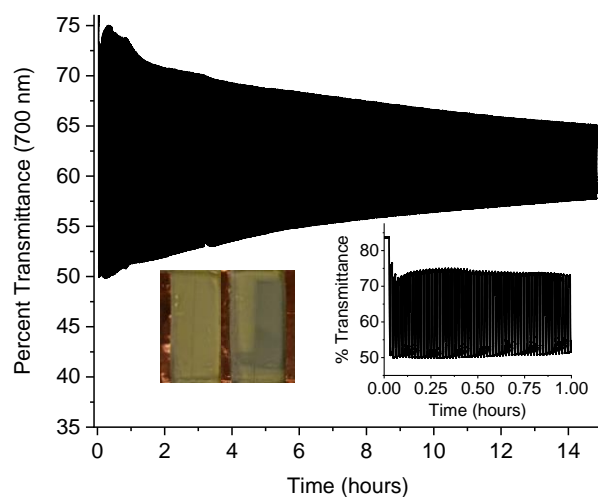

Figure S16. Change in percent transmittance of **2** monitored at 700 nm in an electrochromic device that was fabricated by spin coating and sealed under inert atmosphere and operating continuously for 15 hr. Inset: photographs of the neutral (left) and oxidized (middle) of electrochromic device and zoom of initial first hour of device operation (right).

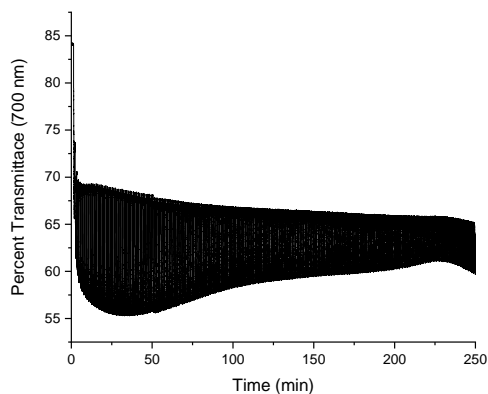

Figure S17. Change in transmittance of spray coated **2** (0.5 mg/mL) in an operating electrochromic device monitored at 700 nm when switching between applied potentials of 2.75 and -0.75 V at 30 s cycling speed.

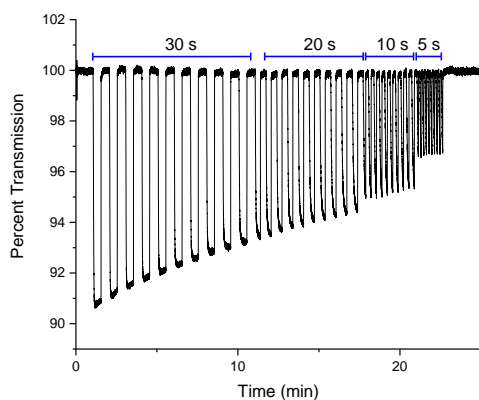

Figure S18. Baseline corrected change in percent transmittance of spin coated **2** on ITO coated glass in an operating electrochromic device monitored at 700 nm at different times of applied potential of 2.5 and -0.5 V.

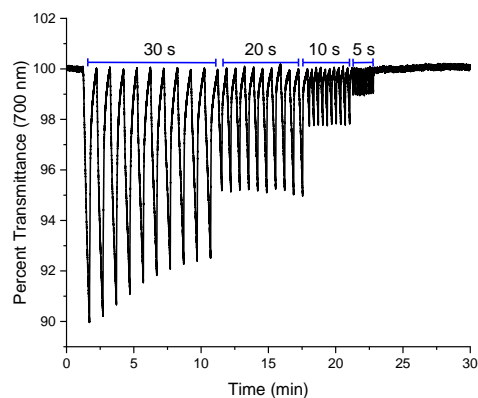

Figure S19. Baseline corrected change in percent transmittance of spin coated **2** on ITO coated PET in an operating electrochromic device monitored at 700 nm with different times of applied potential of 2.5 and -0.5 V.

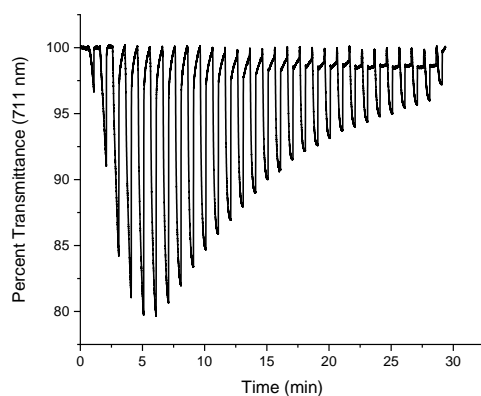

Figure S20. Baseline corrected change in percent transmittance of spin coated **3** in an electrochromic device monitored at 711 nm when switching the applied potential between 3 and -1 V at 30 s intervals.

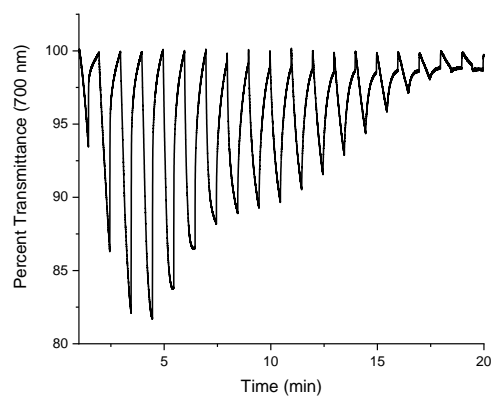

Figure S21. Baseline corrected change in percent transmittance of spin coated **4** (10 mg/mL) in an electrochromic device monitored at 700 nm when switching the applied potential of +2.9 and -1 V at 30 s intervals.

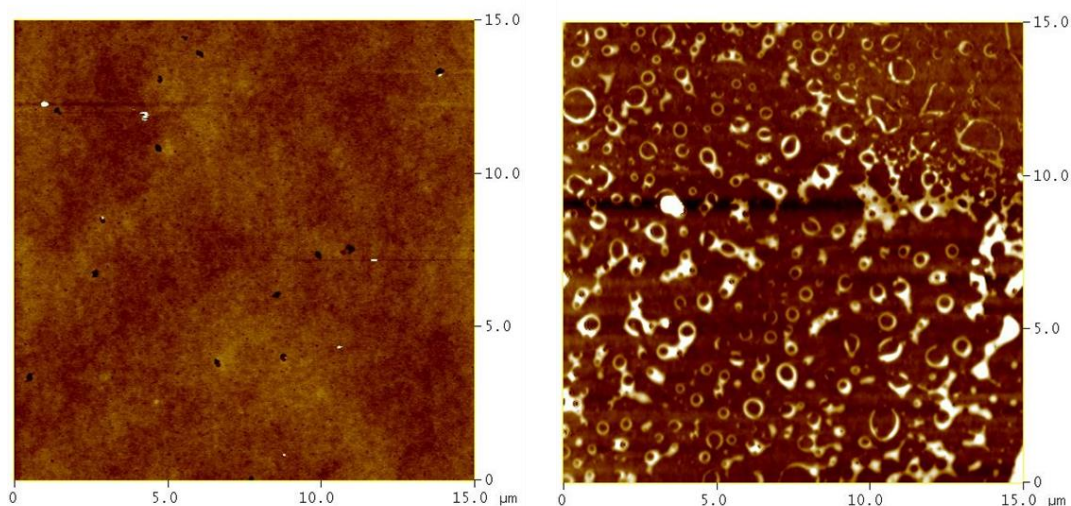

Figure S22. AFM images for surface roughness analyses of **2** spin coated (left) and spray coated (right) on ITO coated glass.

Table S3. RMS roughness of spin and spray coated films of **1** and **2**.

| Sample                   | Avg RMS Roughness<br>3 $\mu\text{m}$ x 3 $\mu\text{m}$ | Avg RMS Roughness<br>15 $\mu\text{m}$ x 15 $\mu\text{m}$ | RMS Roughness<br>50 $\mu\text{m}$ x 50 $\mu\text{m}$ |
|--------------------------|--------------------------------------------------------|----------------------------------------------------------|------------------------------------------------------|
| <b>2</b><br>Spin coated  | $0.7 \pm 0.2$ nm                                       | $0.7 \pm 0.2$ nm                                         | 2.2 nm                                               |
| <b>2</b><br>Spray coated | $6.0 \pm 4.5$                                          | $15.1 \pm 9.6$ nm                                        | 26.1 nm                                              |
| <b>1</b><br>Spin coated  | $0.7 \pm 0.1$ nm                                       | $1.4 \pm 0.8$ nm                                         | 6.3 nm                                               |

Table S4. Average thickness by profilometry of spray coated alkyne layer in an electrochromic device.

| Molecule | Average Thickness (nm) |
|----------|------------------------|
| <b>1</b> | $71 \pm 12$            |
| <b>2</b> | $67 \pm 19$            |
| <b>3</b> | $67 \pm 20$            |
| <b>4</b> | $58 \pm 19$            |

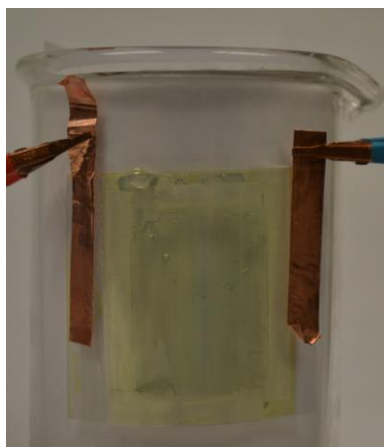

Figure S23. Photograph of electrochromic device of **2** on ITO/PET curved around a beaker (radius=7 cm) with an applied potential of +2.5 V.

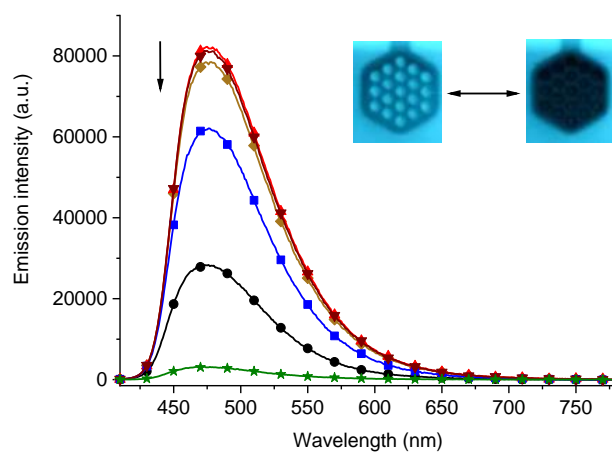

Figure S24. Fluorescence change of **1** in anhydrous and deaerated solution of dichloromethane with TBAPF<sub>6</sub> (0.1 M) when excited at 390 nm with applied potentials of 0 (●), 800 (▲), 900 (■), 1000 (▼) and 1100 (★) mV followed by -100 (◆) mV held for 30 sec per potential. Inset: photographs of the honeycomb electrode of the original (left) and electrochemically oxidized (right) **1** by applying a potential of 1000 mV for 1 min when irradiated with the handheld UV lamp (365 nm).



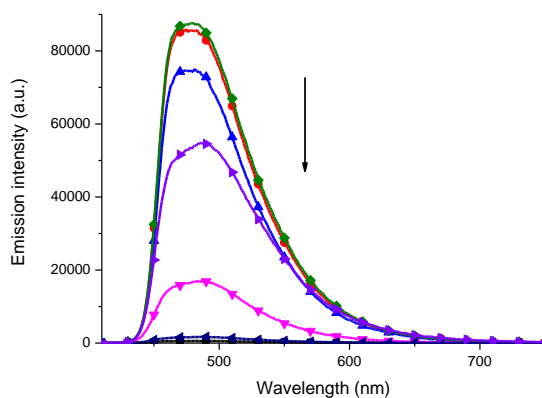

Figure S25. Fluorescence change of **2** in anhydrous and deaerated dichloromethane with TBAPF<sub>6</sub> (0.1 M) as an electrolyte when excited at 390 nm with applied potentials of 0 (◆), 700 (●), 800 (▲), 900 (◀), 1000 (▼), and 1100 (■) mV followed by -100 (▶) mV held for 30 sec per potential.

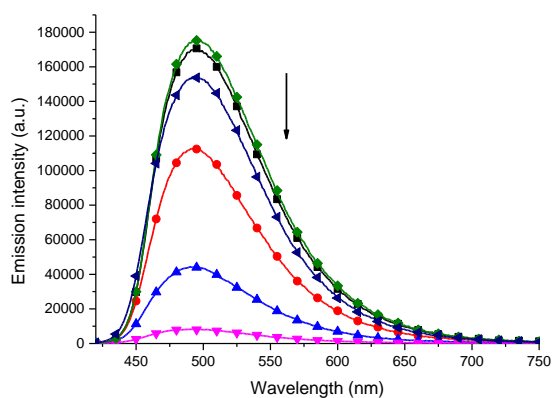

Figure S26. Fluorescence change of **3** in anhydrous and deaerated dichloromethane with TBAPF<sub>6</sub> (0.1 M) as an electrolyte when excited at 400 nm with applied potentials of 0 (◆), 700 (■), 800 (●), 900 (▲), and 1000 (▼) mV followed by -100 (◀) mV held for 30 sec per potential.

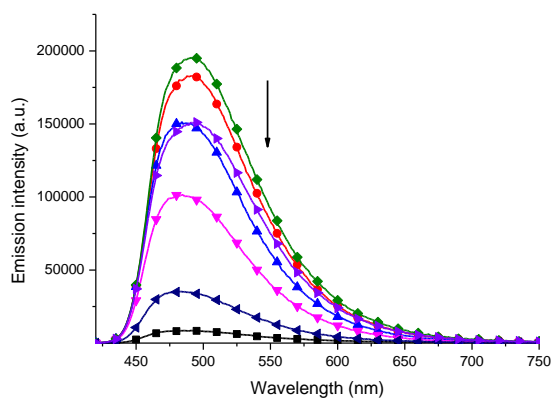

Figure S27. Fluorescence change of **4** in anhydrous and deaerated dichloromethane with TBAPF<sub>6</sub> (0.1 M) as an electrolyte when excited at 405 nm with applied potentials of 0 (◆), 700 (●), 800 (▲), 900 (▼), 1000 (◄), and 1100 (■) mV followed by -500 (►) mV held for 30 sec per potential.

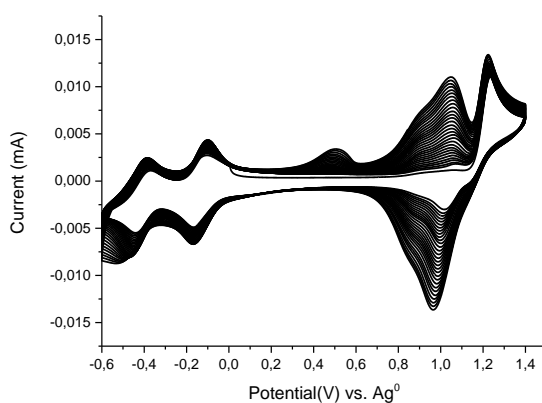

Figure S28. Cyclic voltammogram of **5** measured in DCM with TBAPF<sub>6</sub> (0.1 M) at 100 mV/sec.

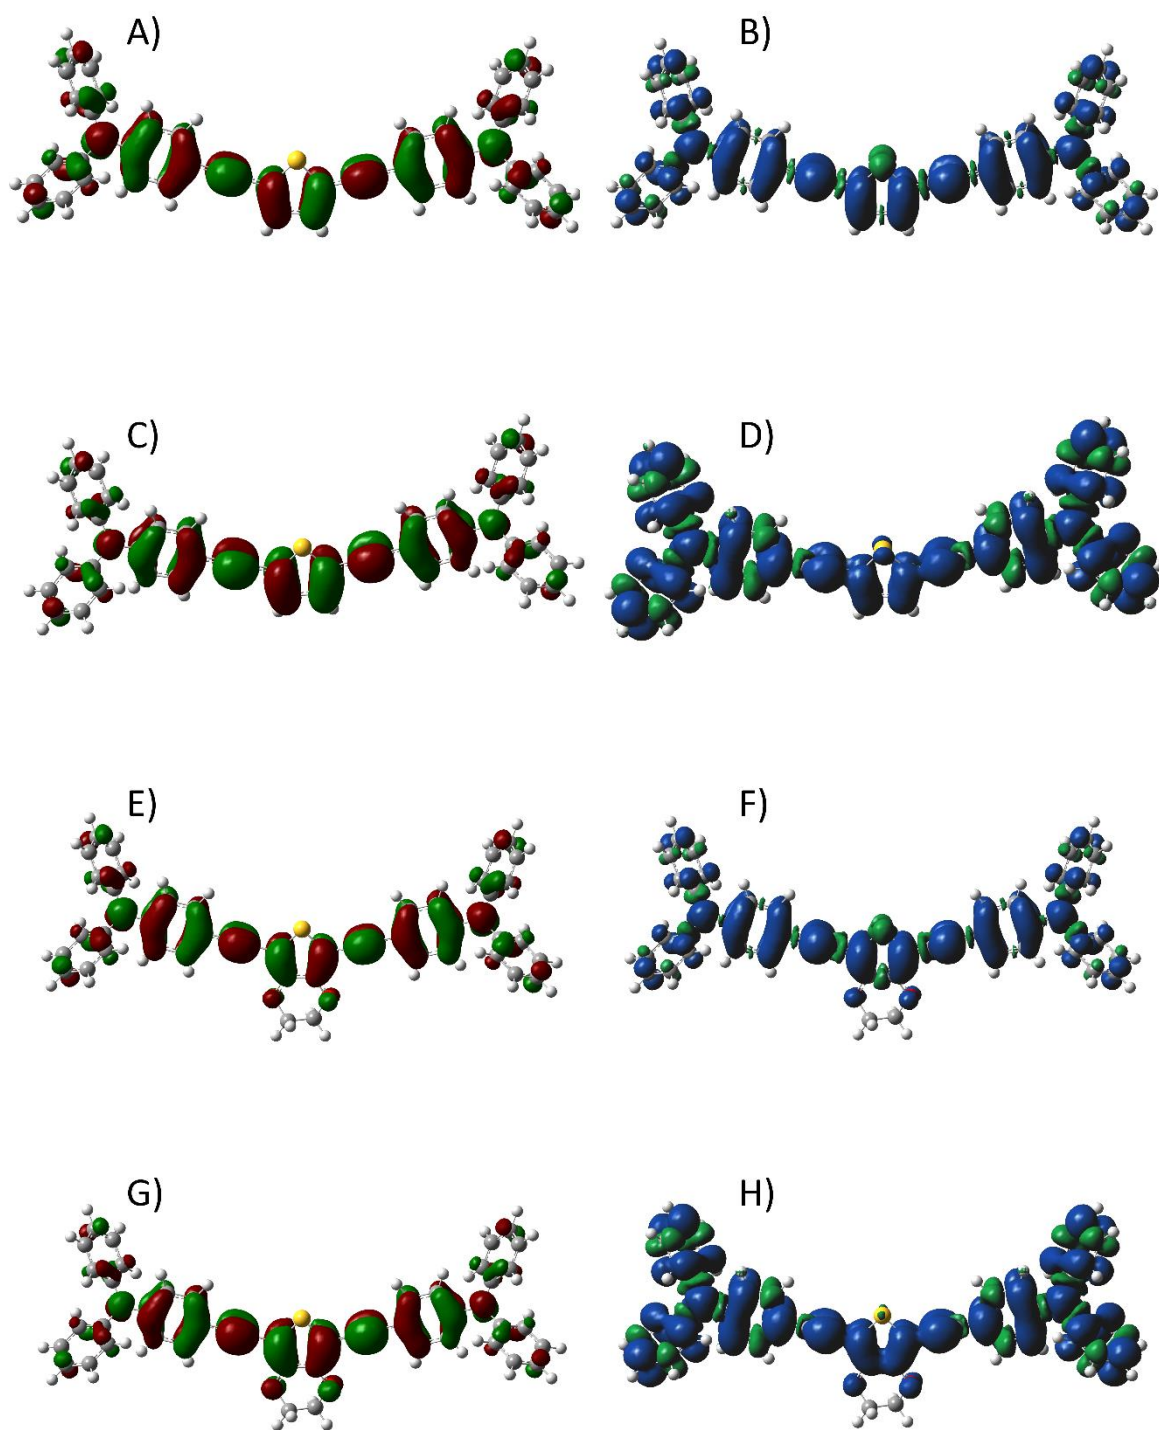

Figure S29. SOMO (left) and spin distribution (right) of the radical cation of **1** (A-B) and **2** (E-F) along with the bis(radical cation) of **1** (C-D) and **2** (G-H) calculated by B3LYP DFT with the 6-311+g(d,p) basis set.

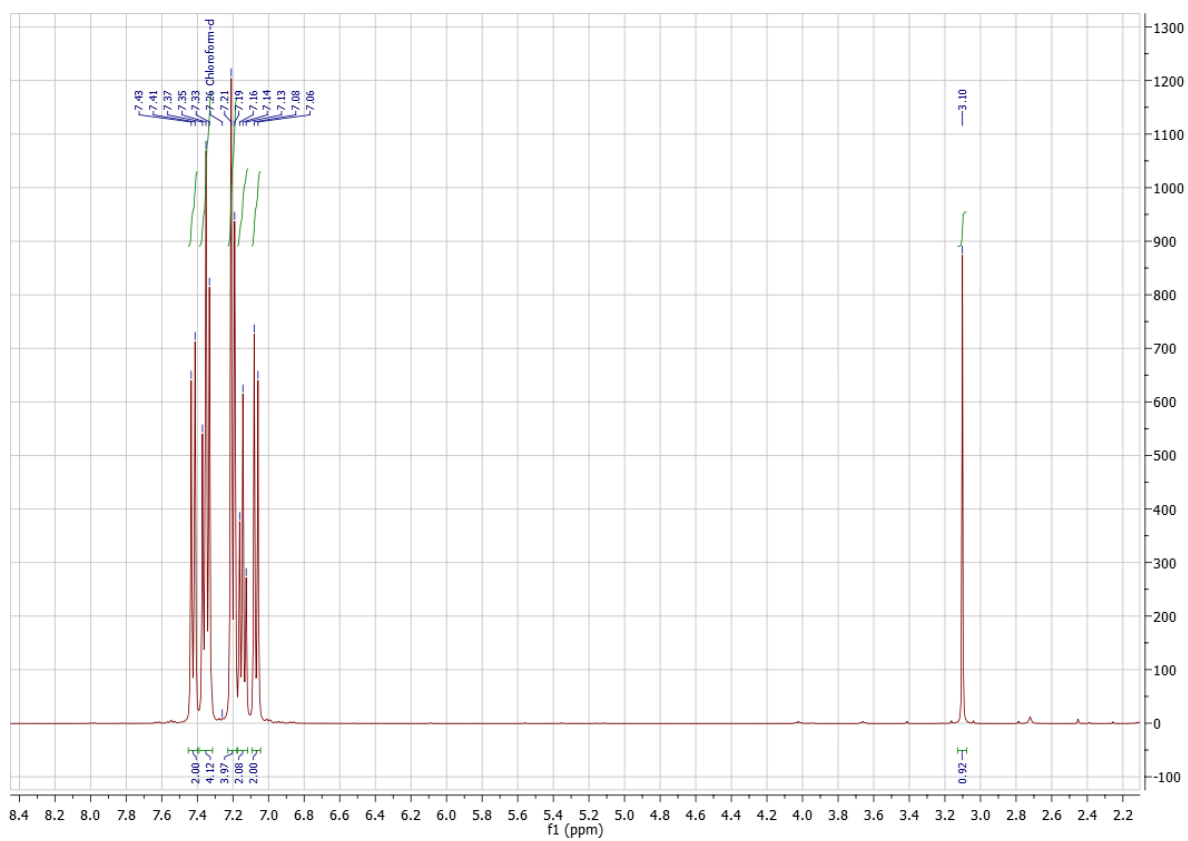

Figure S30. <sup>1</sup>H NMR of A in CDCl<sub>3</sub>.

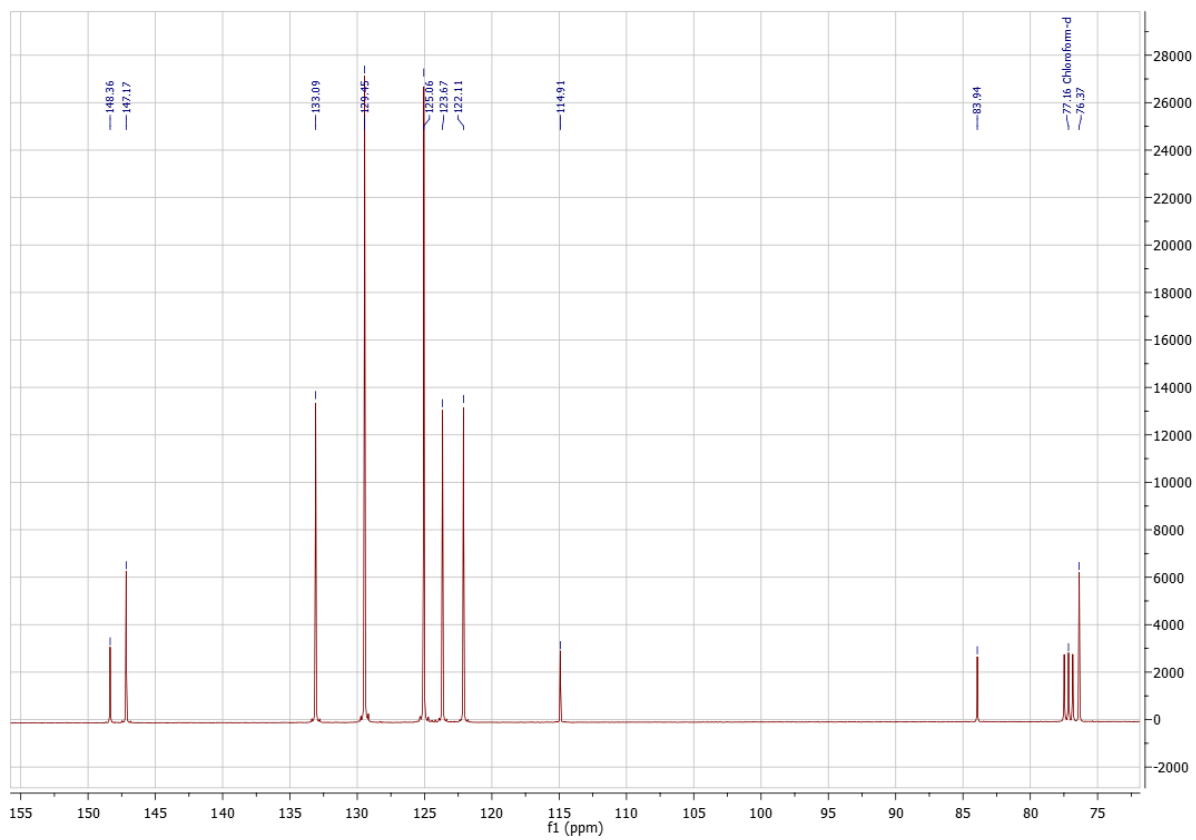

Figure S31.  $^{13}\text{C}$  NMR spectra of **A** in  $\text{CDCl}_3$ .

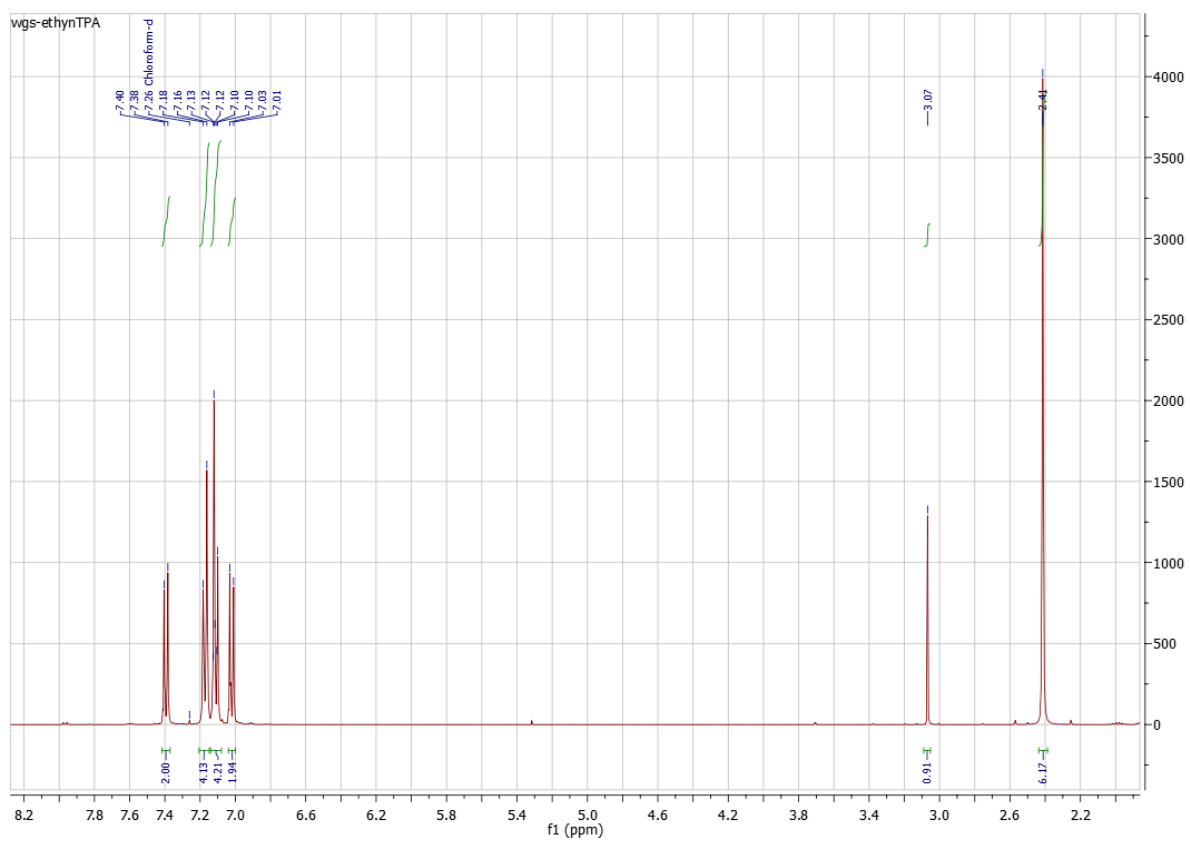

Figure S32. <sup>1</sup>H NMR spectra of **B** in CDCl<sub>3</sub>.

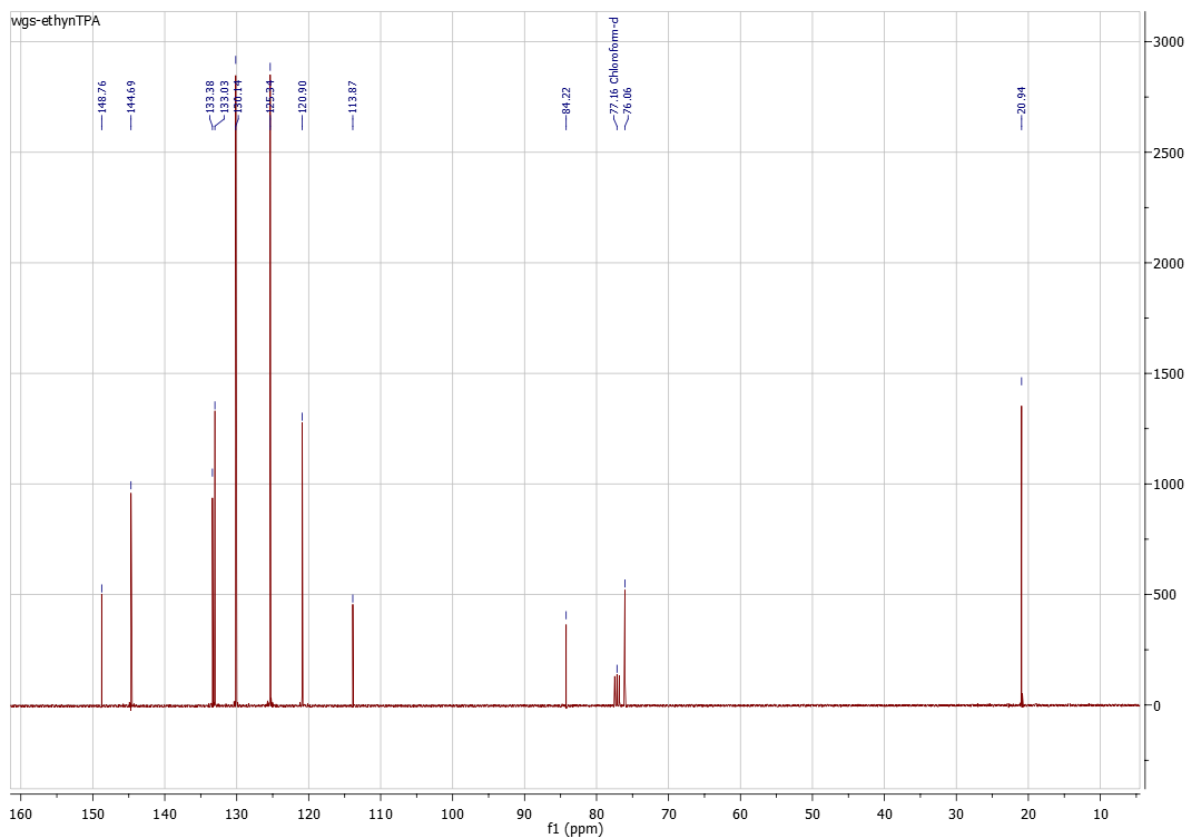

Figure S33.  $^{13}\text{C}$  NMR spectra of **B** in  $\text{CDCl}_3$ .

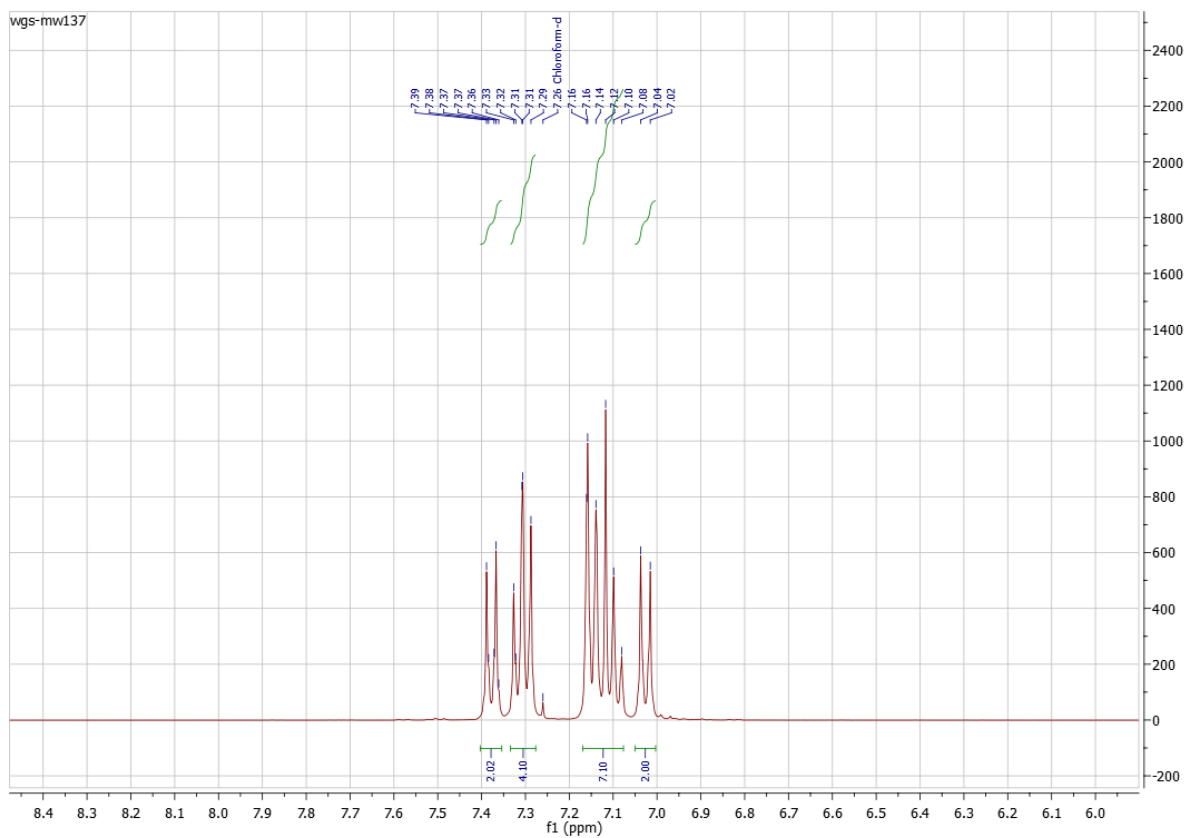

Figure S34.  $^1\text{H}$  NMR spectra of **1** in  $\text{CDCl}_3$ .



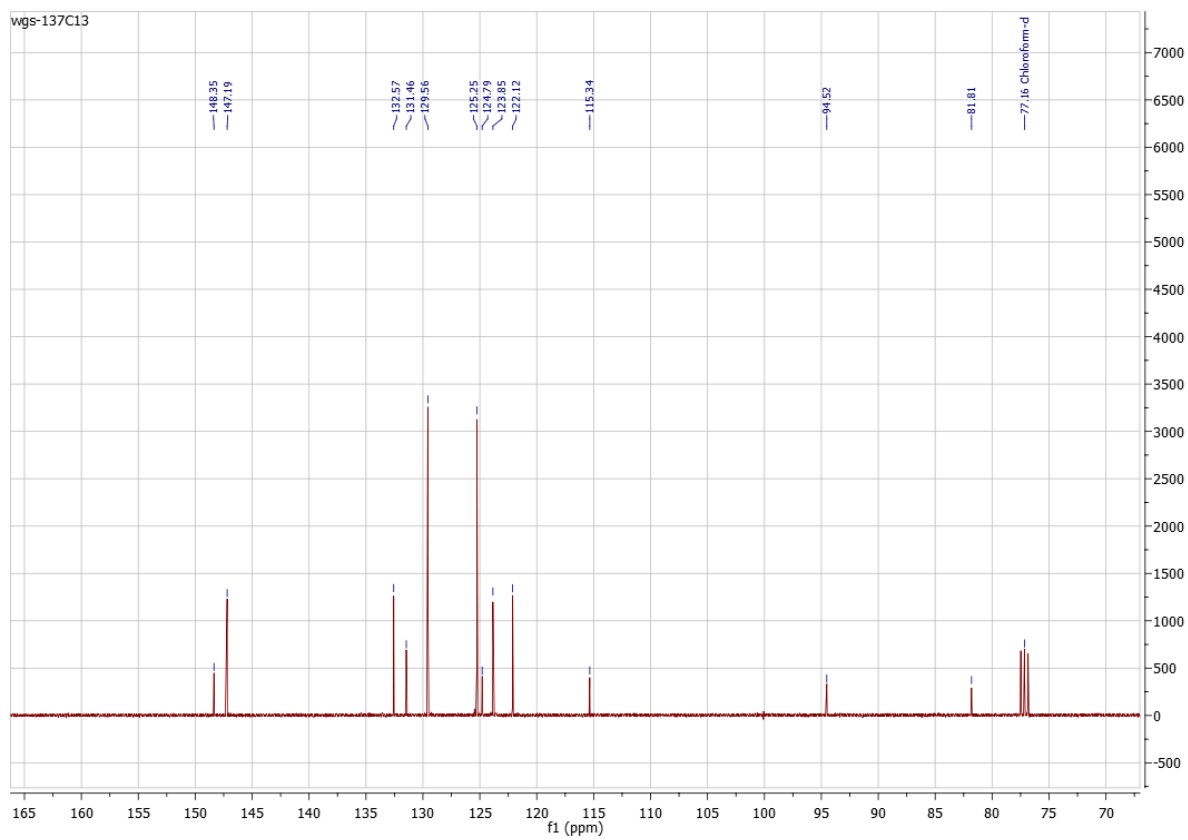

Figure S35.  $^{13}\text{C}$  NMR spectra of **1** in  $\text{CDCl}_3$ .

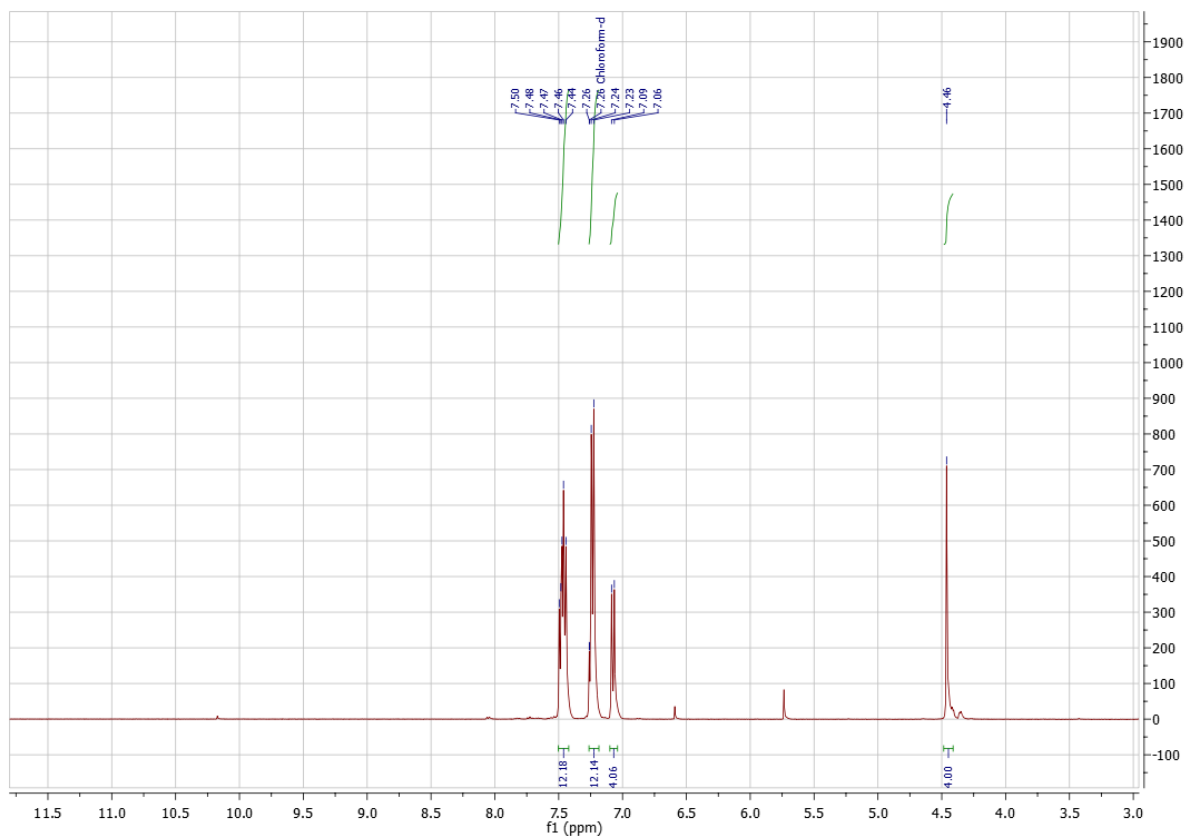

Figure S36.  $^1\text{H}$  NMR spectra of **2** in  $\text{CDCl}_3$ .

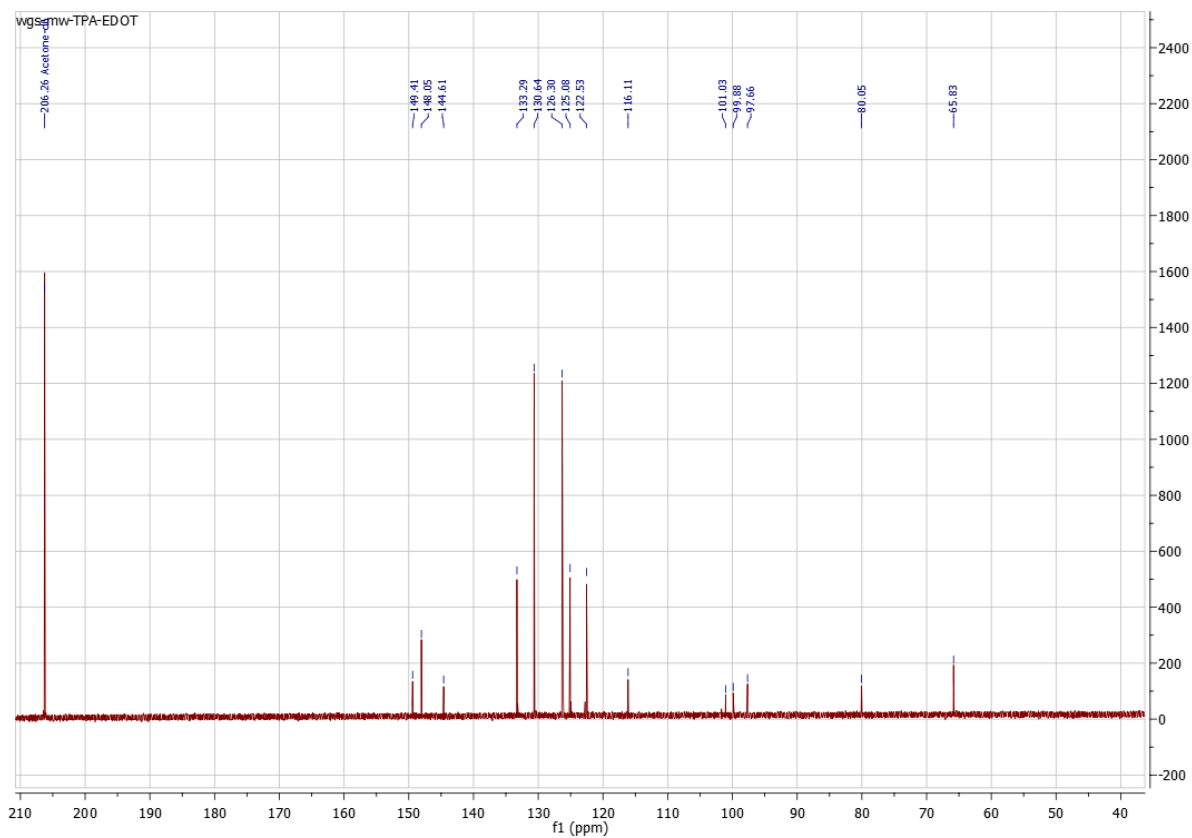

Figure S37.  $^{13}\text{C}$  NMR spectra of **2** in acetone- $d_6$ .

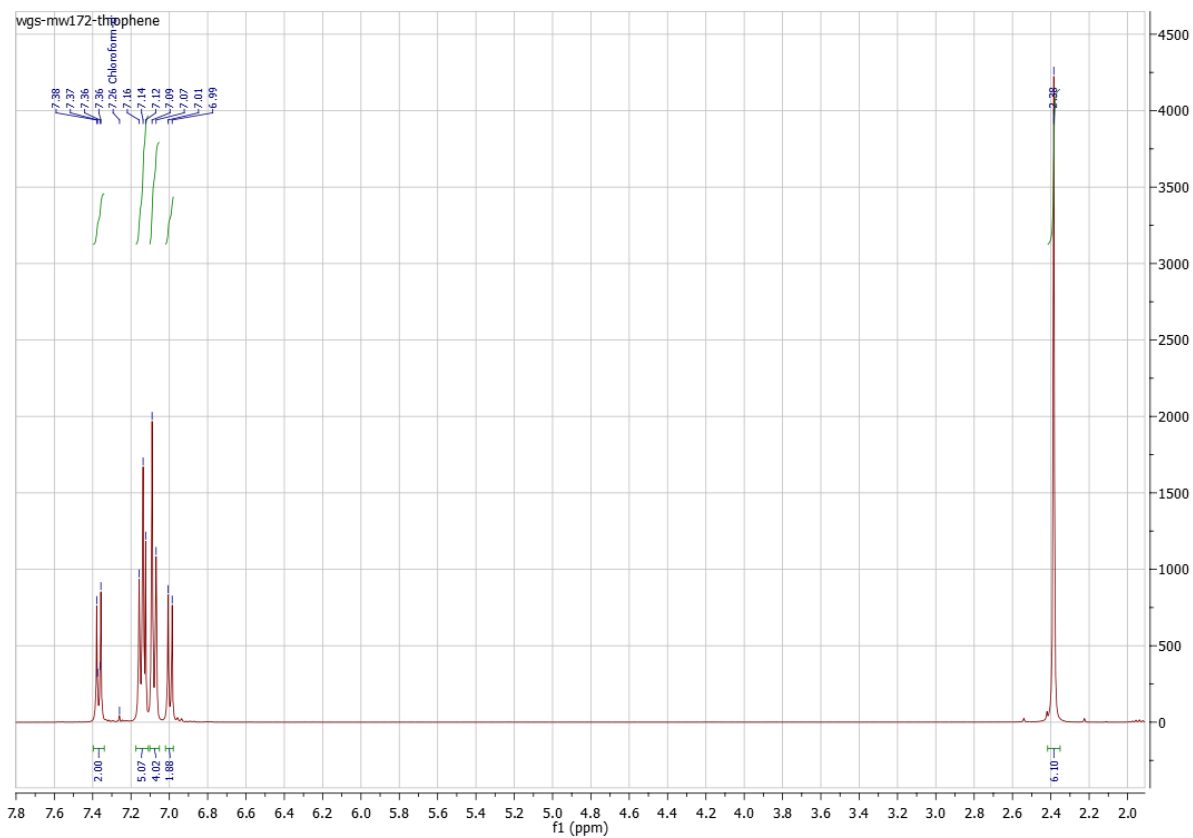

Figure S38.  $^1\text{H}$  NMR spectra of **3** in  $\text{CDCl}_3$ .

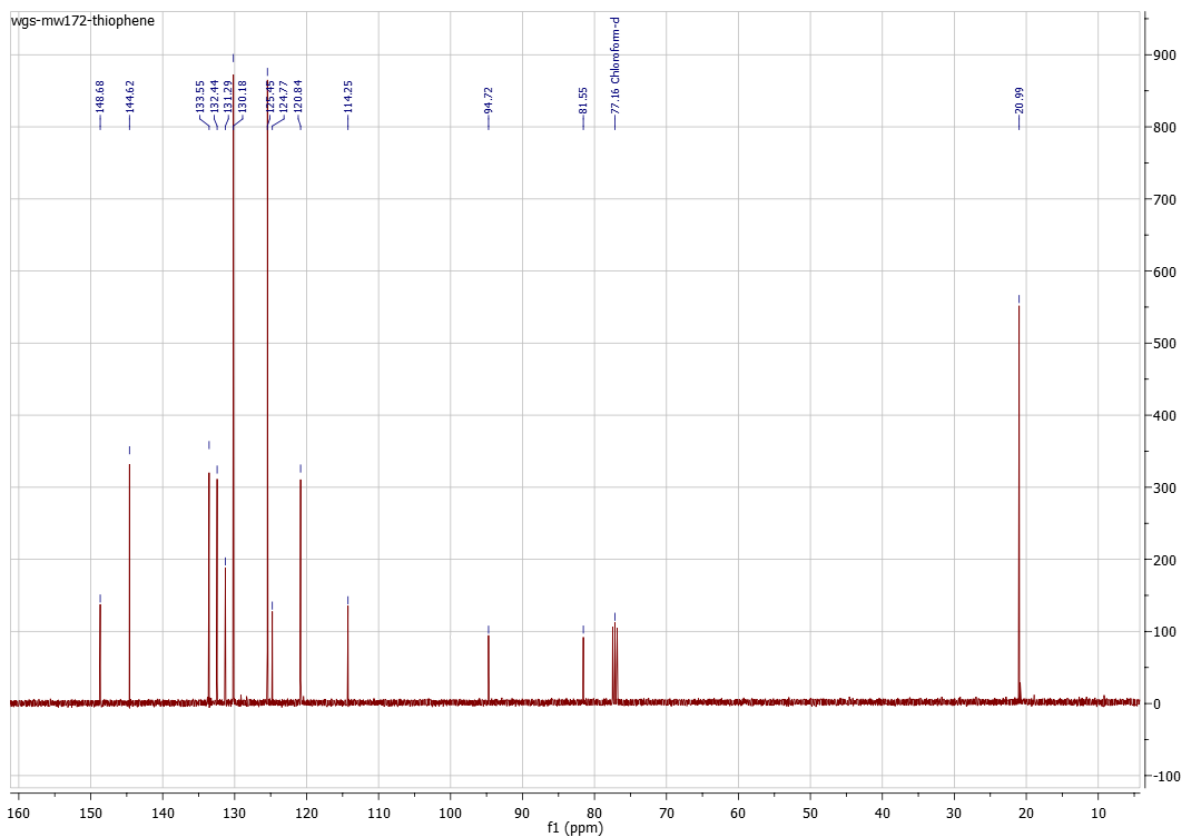

Figure S39.  $^{13}\text{C}$  NMR spectra of **3** in  $\text{CDCl}_3$ .

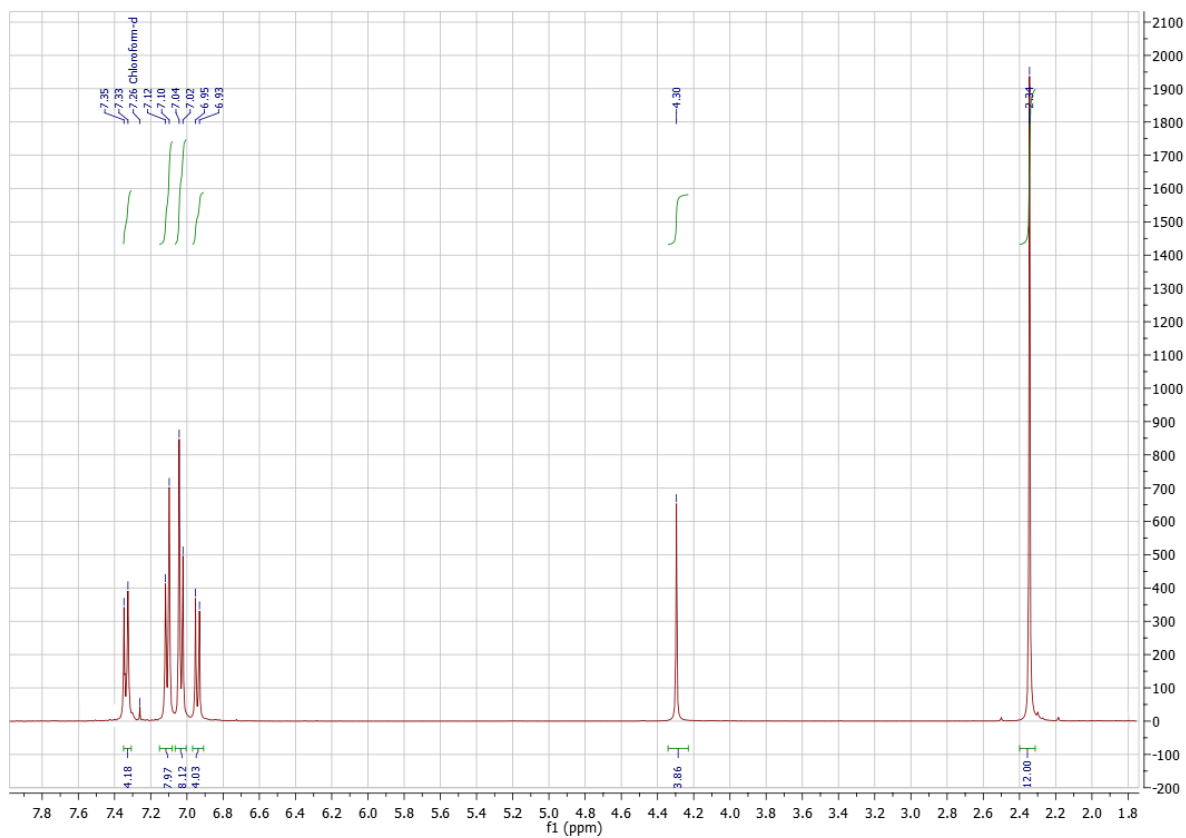

Figure S40.  $^1\text{H}$  NMR spectra of **4** in  $\text{CDCl}_3$ .

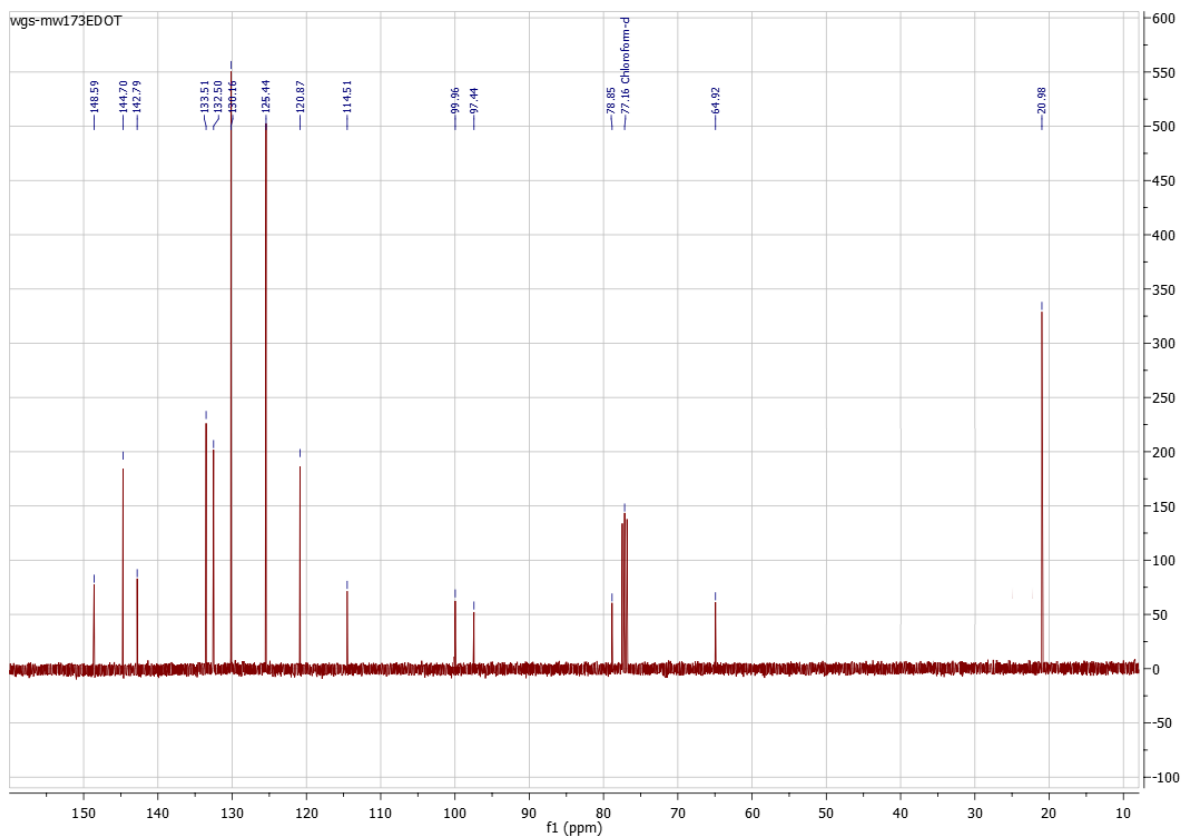

Figure S41.  $^{13}\text{C}$  NMR spectra of **4** in  $\text{CDCl}_3$ .
